# Supplementary material for: 10 years with planet Earth essence in the primary school children drawings
Source: Copernicus journal article supplement (doi:10.5194/gc-2020-10), 2020-03-16
Supplement: Supplementary file [file gc-2020-10-RC1-supplement.pdf]

# 10 years with planet Earth essence in the primary school children drawings

Giuliana D'Addezio

INGV – Istituto Nazionale di Geofisica e Vulcanologia, Rome Italy

giuliana.daddezio@ingv.it

## Abstract

"10 years with Planet Earth" is the title of the 2016 INGV calendar for primary schools resulting from the review of a project conceived to support and complement 15 years of INGV dissemination activities with schools. We made 10 calendars together with and for primary schools, every year with a different subject related to a world in constant evolution. We have launched competitions asking children to send drawings on the themes chosen, to stimulate learning about Earth Sciences and Planet Earth dynamics. We intended to raise awareness on water resources availability, prevention of natural disasters and planet sustainability. For each competition, we chose the most significant drawings to be included in the yearly calendar about the Earth. The authors of drawings were awarded by scientists, journalists, artists and science communicators and even by a minister. Beyond the competitions, the drawings reflect impressions and thoughts, providing an opportunity to illustrate the children's point of view. From drawings arise a great sensitivity, consideration, responsiveness and respect for the Planet and positive feeling for Science. The project was made possible thanks to the teachers and to the wonderful students of more than 200 schools. We received about 10,000 drawings that have intrigued, touched, enchanted, and surprised us. We are grateful for all they have chosen to share with us.

## 1. Introduction

The INGV is one of the most important international research Institution in the field of geophysics and, as part of the National Civil Protection Service, provides important support for seismic and volcanic risk mitigation programs on a global scale and for emergency management. INGV is entrusted with the surveillance of the seismicity of the national territory, the activity of Italian volcanoes and the early warning for tsunami in Mediterranean area, through technologically advanced instrumentation networks. Particular attention is devoted to the dissemination of scientific culture and the development of a culture of risks and prevention. INGV manages museums dedicated to Geophysics and Volcanology: the Geophysical Museum of Rocca di Papa, the Vesuvian Observatory, the Aeolian Information Centres and collaborates in the scientific management of the Laboratory-Museum of Earth Sciences of Ustica and the Volcanological Museum of Nicolosi. In these museums,

35 we conceived and collaborated in the creation of permanent and temporary scientific exhibitions and  
36 installations (Pagliuca et al., 2007; Avvisati et al., 2015; D'Addezio et al., 2015). Furthermore, on the  
37 occasion of national and international events and festivals, INGV researchers and technicians take  
38 action to offer outreach initiatives on Earth Sciences (D'Addezio et al., 2014).

39 We organize every year educational and outreach activities for schools. The goal is to responds to the  
40 needs and the request of the community for more information on issues regarding our planet and to  
41 engage society in a correct, straightforward and efficient communication on scientific research and  
42 technological innovations. In a world that request citizens to be more informed, aware and able to  
43 make crucial decisions about their own health and safety, the knowledge is crucial to handle doubts  
44 and to know how to choose with consciousness. Activities are designed to help raise awareness about  
45 Earth sciences and research activities, as well as intrigue, interest, and stimulate on scientific culture.

46

## 47 **2. The calendar projects**

48 Among the most successful INGV initiatives, is the creation of the school calendars, designed for the  
49 school and realized based on competitions devoted to children of primary school. The intent is to  
50 provide a pleasant stimulus for discussion among scientists, teachers and students. The initiative  
51 achieved great participation and appreciation, and schools join in with enthusiasm by sending  
52 drawings made by children on a specified theme, different each year, chosen among geophysics and  
53 Earth Science arguments. Earthquakes, volcanic eruptions, tsunamis, magnetic storms and other  
54 phenomena are manifestations of the complexity and dynamicity of our planet, which began more  
55 than four billion years ago and never halted. Since the Earth originated from the first presence of  
56 water, life and oxygen, we assisted to the Cambrian explosion of species, the domain of dinosaurs,  
57 the great extinctions and glaciations. The surface of our planet still experiences continents collisions,  
58 mountains and oceans formation and life forms emerging and disappearing. In the past decades, the  
59 problem of global warming was added to Earth dynamisms and will impact profoundly on future  
60 generation, who are already called now to face the crises of climate change.

61 Involve children of primary school in this project give us the chance to both bring science and school  
62 closer and to investigate the children's point of view about Earth, Science, Environment and  
63 Sustainable Behaviour. In fact, the content of children's drawings may provide insight into their  
64 feelings and thoughts about the world and how does it work. Drawing is important for children as  
65 increases their imagination and it is an amazing way of displaying emotion. Children's drawings  
66 can tell you so much about their fears, joys, dreams, hopes and nightmares. The drawings of young  
67 children have attracted and interested many professional  the field of education (Farokhi and  
68 Hashemi, 2011; Cherney et al., 2007). In our project children's drawings represent useful tools in

69 providing valuable information for the assessment of children's environmental perceptions and their  
70 major expectations and concerns for the future.

71 With the exception of the first calendar, a launch call for the initiatives were prepared with  
72 information on the chosen theme, motivations and starting points for discussion. The collected  
73 drawings were then selected based on relevance to the theme, originality, pleasantness of the general  
74 composition and, last but not least, the inherent message. For some collection, also texts have been  
75 chosen among those sent by the kids, together with the drawing. The graphic design of the calendars  
76 were studied and realized by the INGV Laboratorio Grafica e Immagini (Riposati et al., submitted).  
77 Each graphic project was inspired by the theme of competition and has particularly taken care of the  
78 mediation among the drawings, realized with different techniques, different colors and subjects,  
79 always maintaining the centrality of the children's work. In addition to copies of the calendars,  
80 educational materials produced by INGV were sent to the participating schools.

81 Events were organized for the awarding of the winning children. The winners were hosted in the  
82 INGV venue in Rome, with their classmates whenever possible, and with teachers and often with  
83 relatives. They received certificates and medals, games and scientific experiments and T-shirts with  
84 the logo of the competition (Fig. 1). For the award ceremonies we invited scientists, journalists, artists  
85 and science communicators, generally experts on calendar themes. A remarkable event was when the  
86 Italian Minister of Public Education decided to demonstrate her appreciation and support for the  
87 initiative towards schools with her presence, rewarding personally the winners.

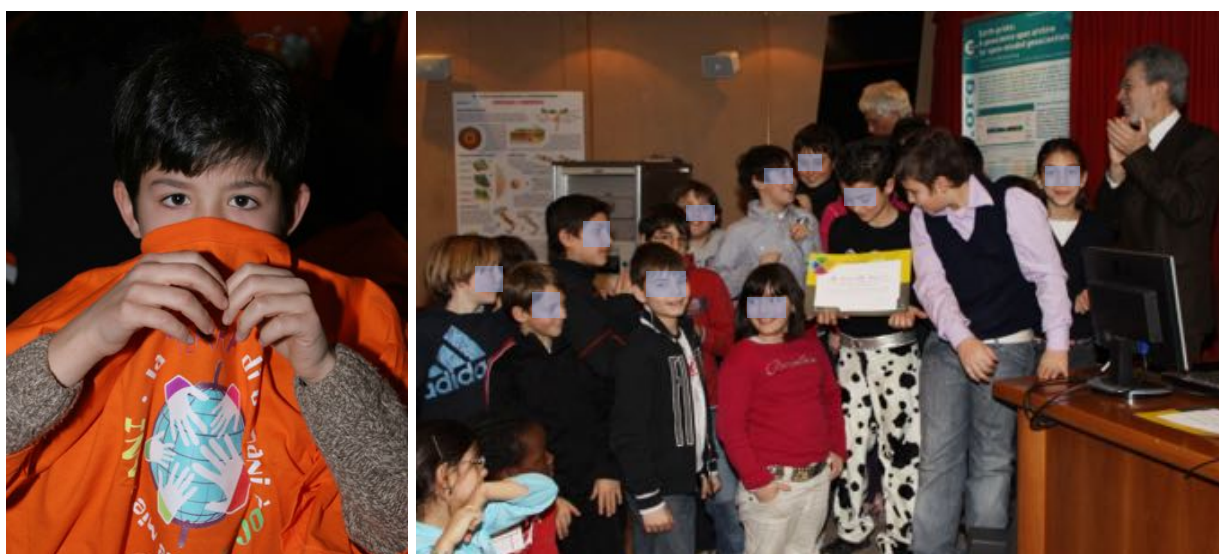

88 **Fig. 1.** Award ceremonies. On the right distribution of the T-shirts made for the 2009 calendar; on the left the  
89 winner's awarding of the 2010 edition (Photos by Luigi Innocenzi).  
90  
91

## 92

93

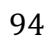

96



111 texts, describing their own impressions of Earth, earthquake, its effects and simple behaviours that  
112 can help reduce the damage.

113

114 *Calendar 2005 – 2006 "Once upon a time there was a Volcano"*

115 Drawings of this calendar were chosen among 853 works dedicated to volcanoes. From the drawings  
116 emerge the fascination and the fear that the "mountains of fire" arouse in children. Month after month,  
117 children tell us the legends of the past regarding volcanoes. Hephaestus, the god of fire in the Greek  
118 mythology, that had his nether forge in the inner of Etna, working alongside the Cyclopes, giants  
119 having a single eye. Many drawings represented the volcano as an island recalling the homonymous  
120 island in the Eolian archipelago, the dwelling of the god of fire for the ancient roman people, ~~Volcano~~  
121 It's from ~~Volcano~~ Island itself that, at the end of the Middle-age, the mountains of fire were given  
122 the name volcanoes. Children represent also volcanoes in activity, illustrating damage of eruptions  
123 with fire and flames, housing in danger and frightened people but also the role of volcanoes for the  
124 life of the planet with emissions of flowers and fish from craters and the slopes of the volcano covered  
125 with vegetation.

126

127 *Calendar 2006 – 2007 "Telling the Story of the Earth"*

128 In this calendar, children drew the Earth's History and the many different living beings that have  
129 dwelled on it, showing Mother Earth's diversity and grandeur. We received 2200 drawings,  
130 illustrating the children's point of view on the history of the planet, from the origin of the Universe  
131 and of the solar system, the first forms of life, the differentiation of species in waters and then on  
132 land, dinosaurs, volcanoes, mammals and humans. Through the children's drawings you ~~will~~  
133 ~~recogniz~~ the story of an extraordinary adventure, a Universe full of energy, seas and oceans crowded  
134 of life forms, unmissable giant dinosaurs grappling with smoking volcanoes and luxuriant vegetation,  
135 the beginning of the human race, with human ancestors and other hominids engaged in hunting, and  
136 finally the incoming of civilization.

137

138 *Calendar 2007 – 2008 "Living with a Star"*

139 In occasion of the International Heliophysical year (IHY) we dedicated the to the Sun the 2007  
140 competition (Fig. 3). By partnering with COST269 project, to this competition participated school  
141 from 8 European countries (Czech Republic, Cyprus, Finland, France, Italy, Poland, Spain and United  
142 Kingdom). Drawings have been chosen among about 1300 works. Realized in all the languages of  
143 participating countries, this calendar has collected images of many suggestions that "our star" evokes  
144 in children. Fantastic images of the Sun in the space with other celestial bodies, with rockets and

145 satellites observing and studying. Drawings that recall life on Earth, the sun with rainbow rays and  
 146 the warm ones in the summer beaches. Images related primarily to the idea of energy and life that the  
 147 Sun brings with it, but also the phenomena related to the interaction with the Earth at different  
 148 latitudes: eclipses, auroras, the Sun in summer and non-Sun in winter.  
 149

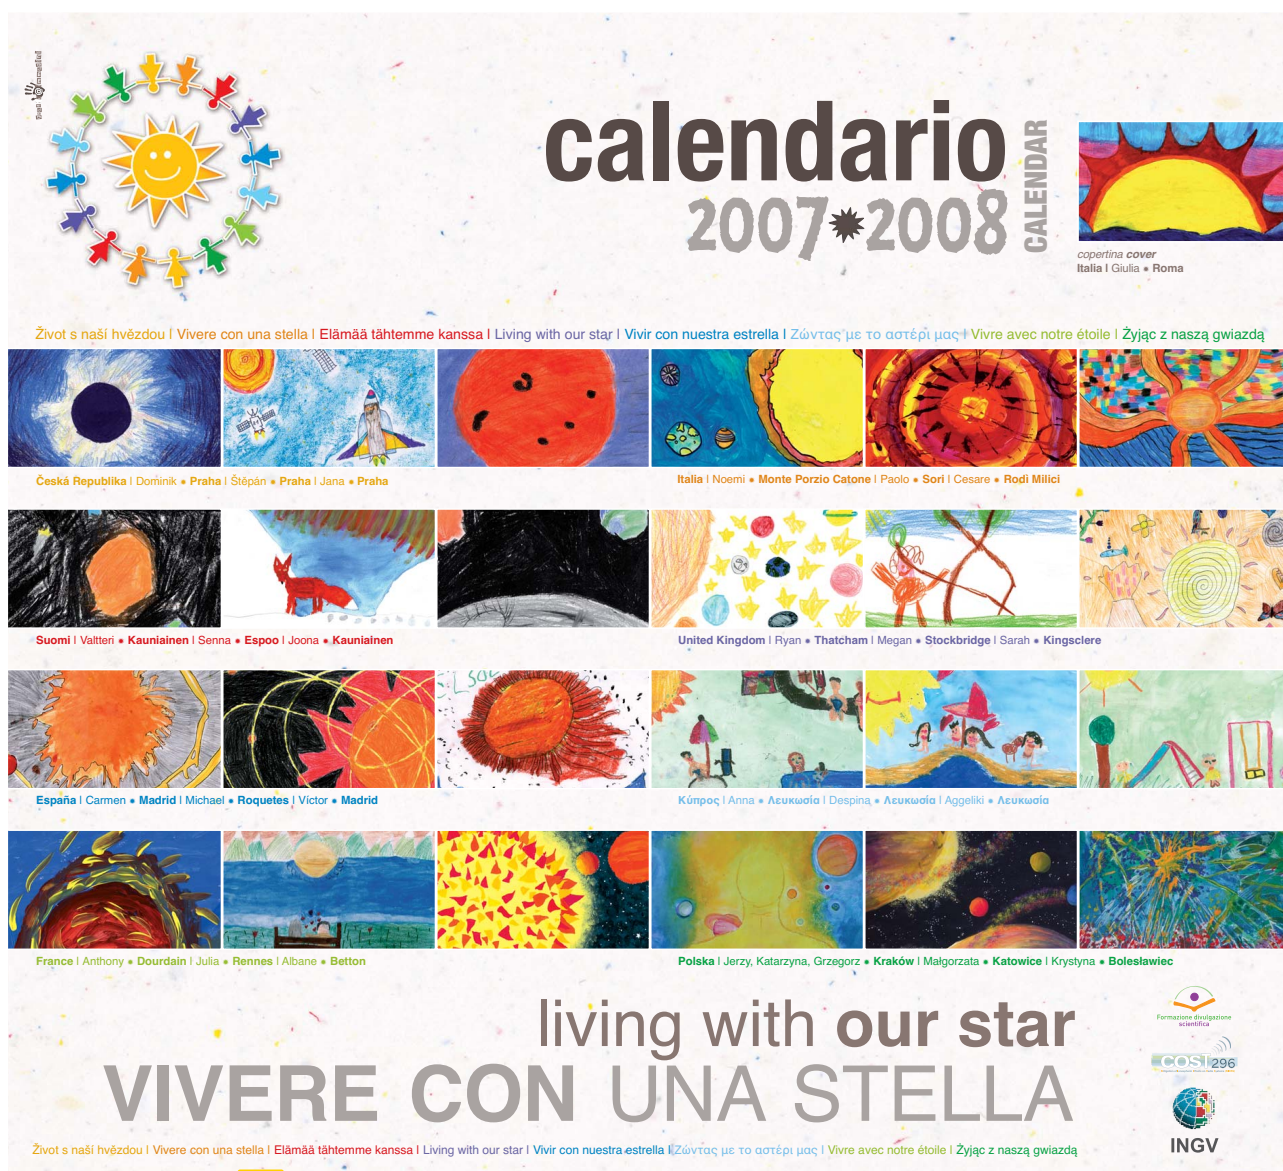

150  
 151 **Fig. 3.** The back cover of the 2007-2008 calendar dedicated the to the Sun and realized, by partnering with  
 152 European countries of COST269 project, in 8 languages (edited by INGV Settore Formazione e Divulgazione  
 153 Scientifica and INGV Laboratorio Grafica e Immagini).  
 154

155  
 156 *2009 Calendar "The Earth of tomorrow is today in my hands"*

157 For the UNESCO International Year of Planet Earth we focused on the issue of human responsibility  
 158 on the sustainability of the planet, trying to stimulate ~~in young~~ attention in young, but active citizens of  
 159 tomorrow. Children's relationships with nature for environmental education are already explored  
 160 using draw and write methodology (Kalvaitis and Monhardt, 2012). Climate change will have

multiple effects on human health and is the defining young human development challenge of the 21<sup>st</sup> century. We suggested topics on climate, oceans and seas and continental water to sensitize younger generation about the Earth beauty and the natural resources, as well as natural hazards and the relation between human's and Earth's health. Children responded by sending drawings of rainbow waterfalls, volcanoes and flower fields but also with images against the environmental degradation and the indiscriminate use of the planet's resources, disrespectful behaviours fought sometimes with contribution of "Superheroes" or protectors. Moreover, drawings telling natural environments and everyday life highlight virtuous and environmentally friendly behaviour, respect for environment and the importance of taking care (Fig. 4).

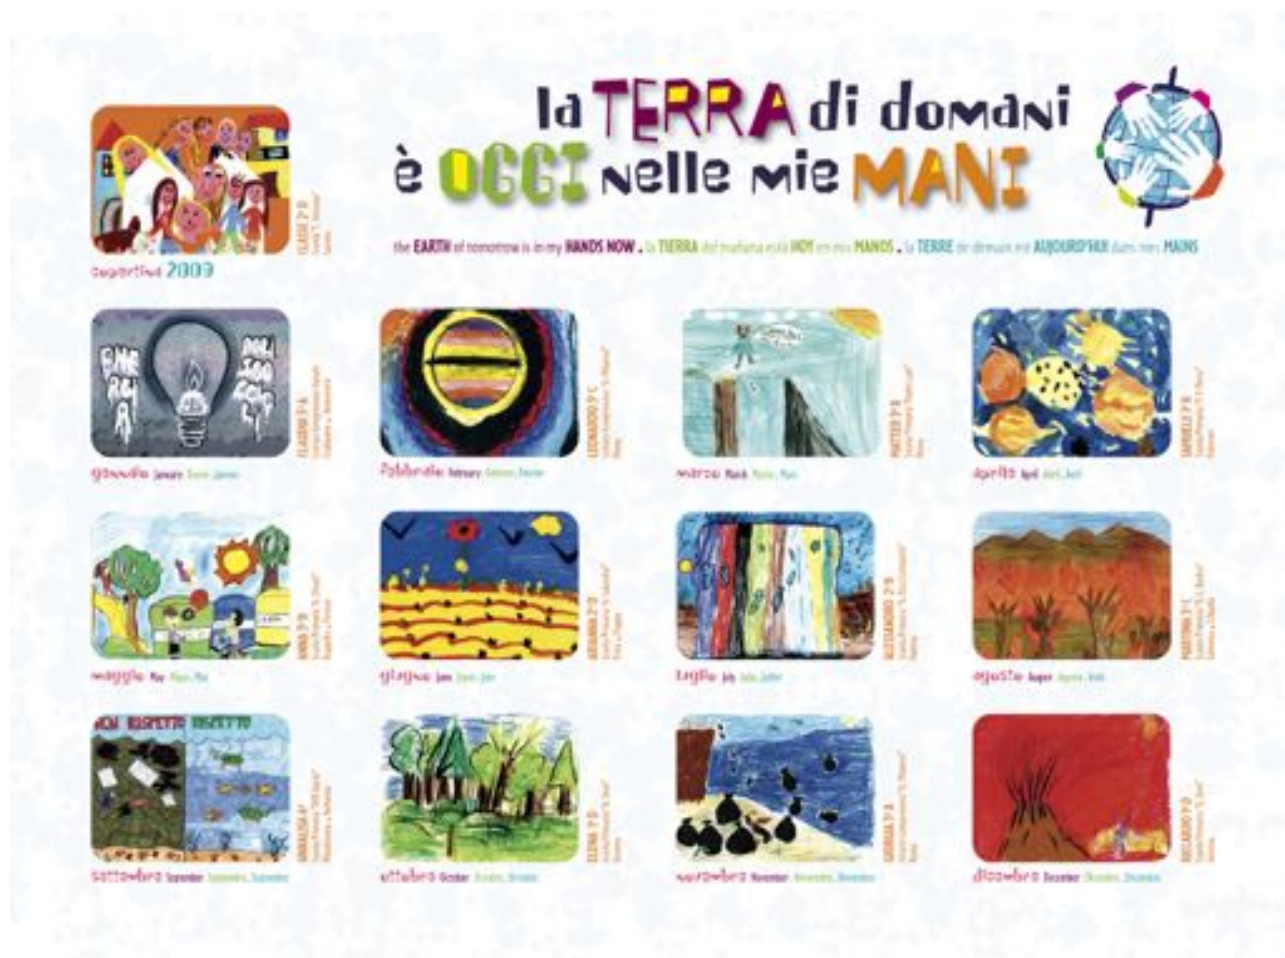

**Fig. 4.** The back page of the 2009 calendar dedicated to the Earth and to the today responsibility to protect the environment (edited by INGV Laboratorio Didattica e Divulgazione Scientifica and INGV Laboratorio Grafica e Immagini).

#### 2010 calendar "Precious Earth"

The 2010 calendar still focused children's attention on planet Earth and the effect of human activity on the Earth. We asked children to use creativity and sensitivity to design a message, an image to promote planet Earth. The title, Precious Earth, was chosen to underline that our existence completely



180 depends on the planet Earth, where we have been evolved. We are part of it and will continue to be  
181 so if we manage to maintain a dynamic balance between a sustainable life and the Earth ecosystem.  
182 The alteration of the planet natural climate cycle requires responsible and efficient use for the future  
183 and in parallel the promotion and development of alternative energy sources that our planet is  
184 potentially rich in. From the drawings and the texts we have collected emerge a great sensitivity for  
185 the issue, respect for the planet, the consciousness of its beauty and uniqueness and the sadness for  
186 activities perceived as wrong. Also from the texts the same sensitivity emerges, i.e.: *Va bene cercare*  
187 *un altro mondo ma se ti trattiamo bene sarà sempre bello chiamarti casa* It's okay to look for another  
188 world but if we treat you well it will always be nice to call you home. *Chiudo gli occhi e sogno un*  
189 *mondo pulito e nessuno alza un dito. Sogno le persone rispettose dell'ambiente e la natura tornare*  
190 *vincente* I close my eyes and dream of a clean world and nobody raises a finger. I dream of people  
191 who respect the environment and nature become winning again.

192

193 ***2011 Calendar "I'm a Scientist too! Science and scientists from the children point of view"***

194 In the International Year of Youth, established by the United Nations General Assembly, the theme  
195 was selected with the purpose of giving shape to the image children have of the world of science, its  
196 potential and its future perspective, as well as the image they have of scientists and research. Children  
197 were asked to create a drawing from three suggestions: (1) How do you imagine a scientist? How do  
198 you imagine the daily activities of a researcher? (2) What is the invention you consider the most  
199 important among all those you know? (3) What would you invent?

200 During the competition, 986 drawing were collected. What we got is a colorful and busy world, full  
201 of young scientists confident in the power of science and technology, engaged in inventing devices  
202 to make you happy, to travel in space and time, and to solve the problems of the Earth (Fig. 5).

203 A sample of 200 drawings have been analyzed in order to test and tune a classification scheme and  
204 to infer some considerations of the perceived image of science, scientists and inventions from the  
205 child's point of view (Rubbia et al., 2015). The analysis reveals a persistent gender stereotype related  
206 to scientists, since 70% of the depicted persons were male and 45% of girls draw male scientists. The  
207 image of a 'mad scientist', mainly related to male scientists, is still present (15%). Female scientists  
208 are drawn by girls; they are represented as young, not crazy and are usually good-looking. Scientists  
209 of both genders are young, and this is a positive image, in that scientists may be perceived as closer  
210 to everyday life (Rubbia et al., 2015).

211

212 ***2012 Calendar "Mission Possible: let's save the world"***



213 The theme was inspired by the International Year of Sustainable Energy for All, designated by the  
214 United Nations General Assembly to promote research of new green technologies and to focus on  
215 environmental problems and the future of the Earth. Our planet provides all those resources that have  
216 allowed life to flourish. Many of these resources depend on delicate balances and are not unlimited.  
217 We consume more resources than the Earth can generate. Almost all of the energy and raw materials  
218 we use to produce or build what surrounds us and are needed to live comes from the Earth. A land  
219 that feeds, warms and offer us beauty.

220

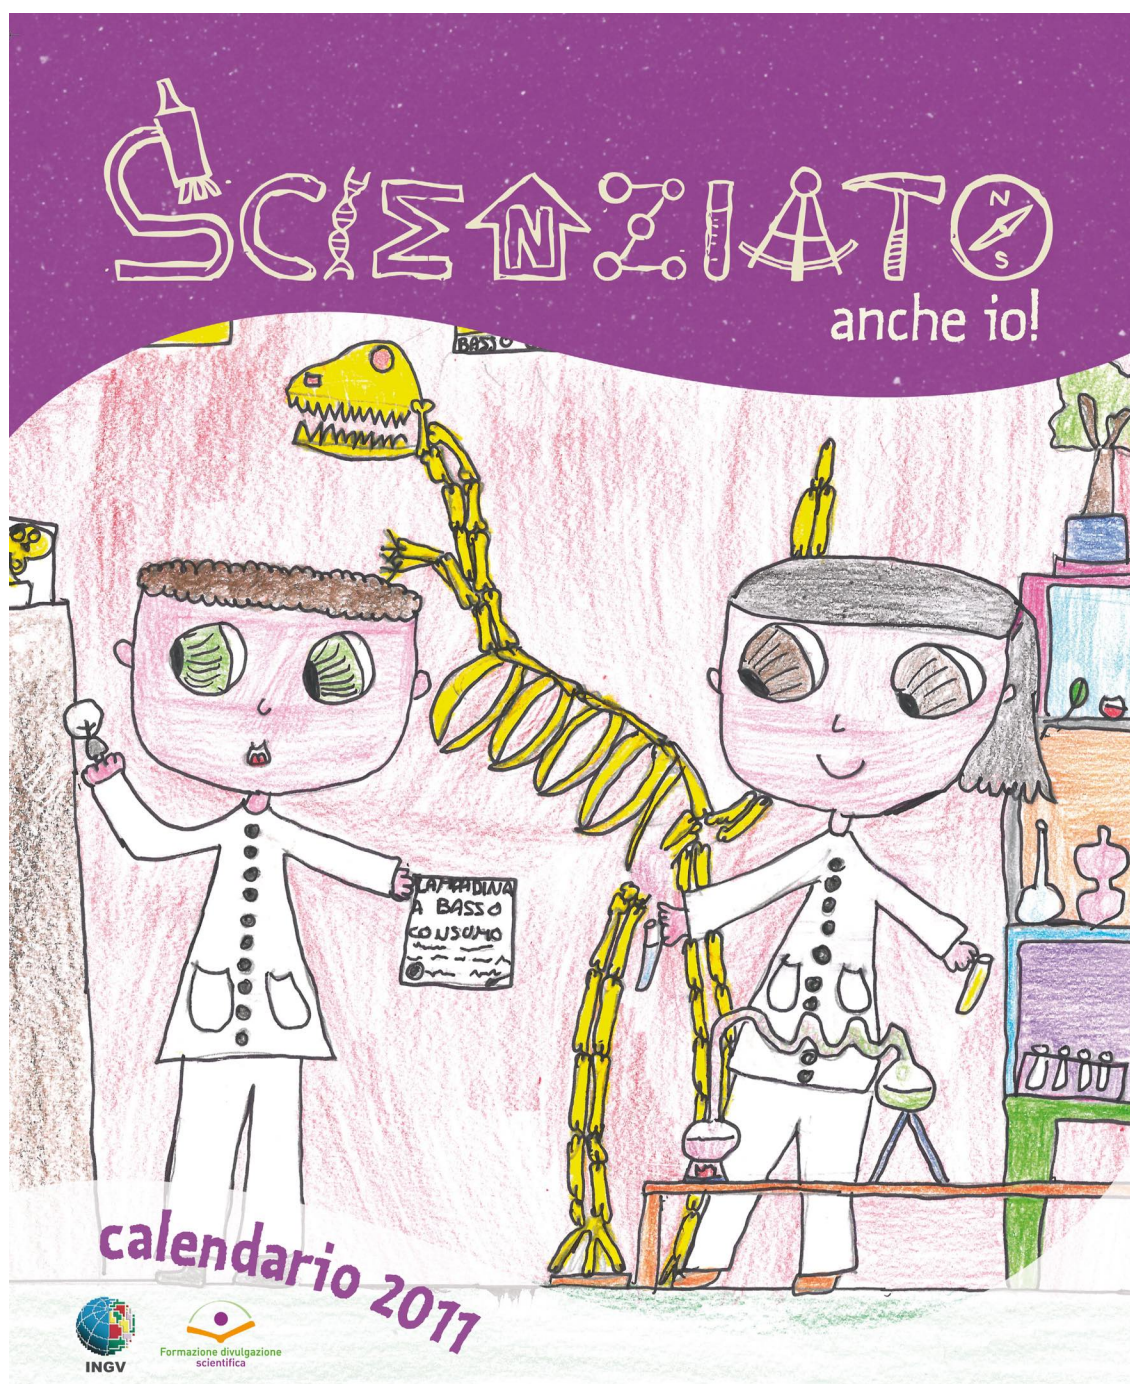

221  
222



**Fig. 5.** The design chosen for the 2011 calendar cover, summarizes the main themes present in the drawings sent by the children. Smiling scientists, confident of the potential of science, engaged in enthusiastic discoveries to improve planet life (edited by INGV Laboratorio Didattica e Divulgazione Scientifica and INGV Laboratorio Grafica e Immagini).

The suggested priority for the possible mission were:

- 1) to counteract the pollution of air, water and soil;
- 2) stop global warming and the destruction of ecosystems;
- 3) develop new green technologies.

The children's fantasy enhanced us to the images of a planet with rainbows, trees, clean rivers and lakes, the desire to be useful creating pedals school buses, eco-volcanoes, machines that convert waste into flowers. In fact, the real children's challenge was inventions. Green ideas and technologies based on solar energy for high-speed train or pizza ovens, obtaining the energy from destroying weapons or harnessing volcanoes (Fig. 6). In other words, Sustainable Development that is able to meet the needs of now without compromising those of future generations.

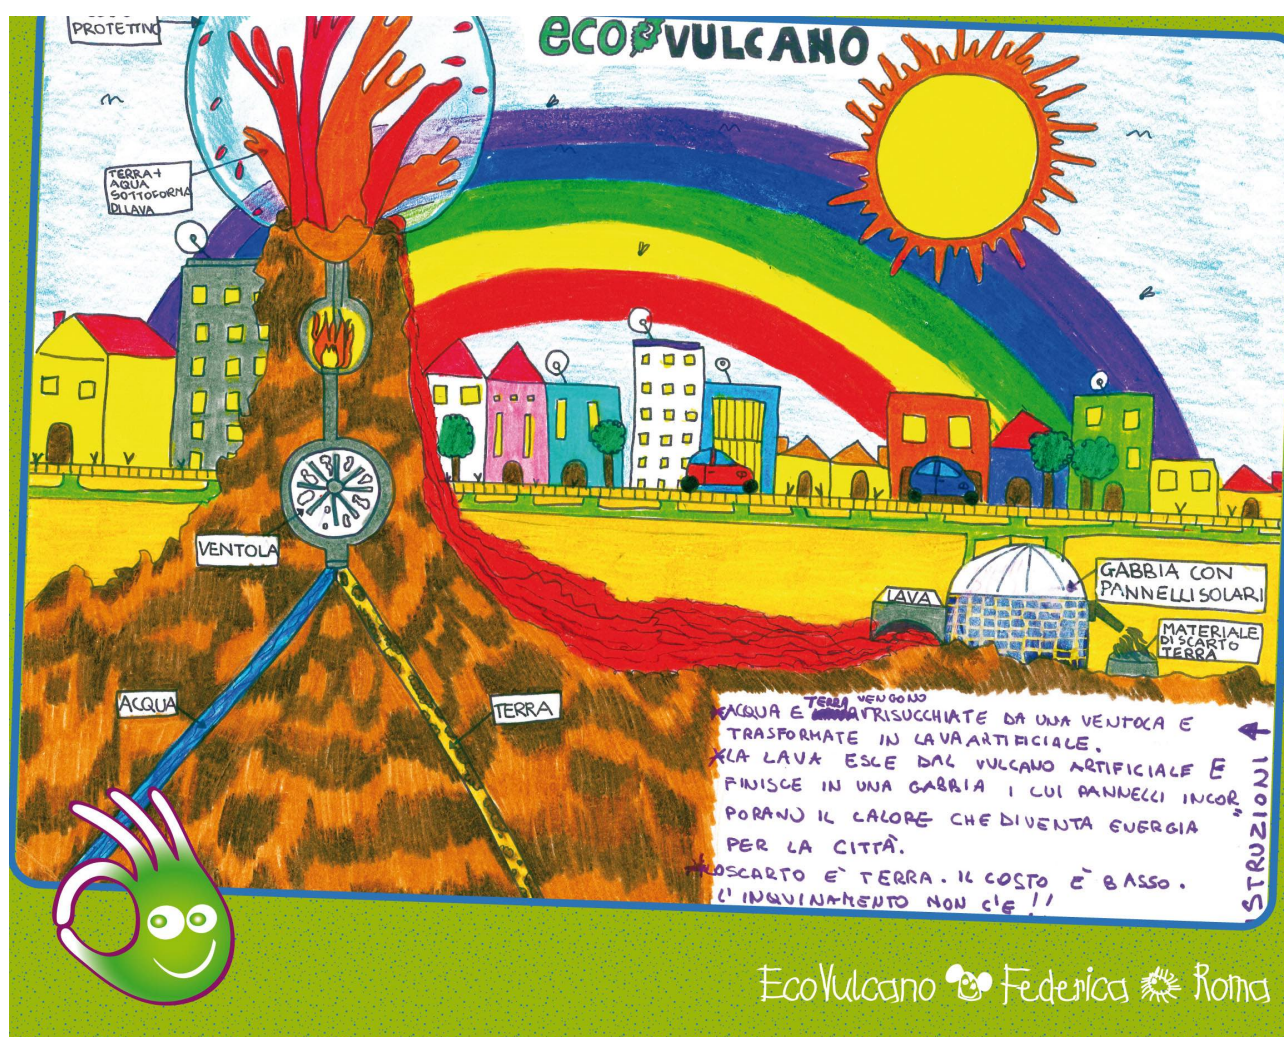

242 **Fig. 6.** One of the drawing selected for the 2012 calendar. In the drawing a very complex project of a eco-  
243 volcano, with very detailed instructions and precise statements on the low cost of the project and on the absence  
244 of pollution (edited by INGV Laboratorio Didattica e Divulgazione Scientifica and INGV Laboratorio Grafica  
245 e Immagini).

246

247

248 *2013 Calendar "In the heart of the Earth"*

249 What students of primary schools imagine there is inside the Earth? Scientists agree for a  
250 representation of the interior of the Earth, but to date no one has yet gone to check. Inside the Earth,  
251 temperature and pressure increase progressively until reaching very high values, capable of challenge  
252 any technology known to date. We went to the moon, but we have not been able to go for more than  
253 a few kilometres inside the Earth. From the 1034 drawings we have received, the interior of the Earth  
254 is definitely very colourful and sometimes animated by turtles, butterflies and fire-breathing dragons.  
255 In some cases consists of candy, cream and chocolate, through precious stones and fire of volcanoes.  
256 Some drawings were inspired by legends and myths alluding to the existence of underground, hidden  
257 and mysterious worlds, inhabited also by peoples and fantastic creatures.

258

259 *2014 Calendar "The Magic of Water"*

260 Water is an essential part of the Earth and contributes to make unique our planet. Precious and  
261 indispensable to life, is a wealth we are claimed to protect. Consciousness helps us to increase  
262 awareness avoiding water wasting or pollution.

263 We received 1195 children's drawings, where water is represented in its plentiful manifestations, in  
264 the atmosphere and on Earth's surface (Fig. 7). Placid waters of lakes and lagoons, pouring waterfalls  
265 where the sun is reflected, along with more troubling water that gives rise to glaciers and ice figures  
266 and polluting boats. There are also suggestive images that remind extreme events such as floods and  
267 very powerful rain phenomena. A sign of awareness where understanding water multiple and  
268 sometimes powerful manifestations in the atmosphere and on the Earth surface, enhance correct use  
269 of territory and a behaviours of respect and attention towards the natural environment.

270



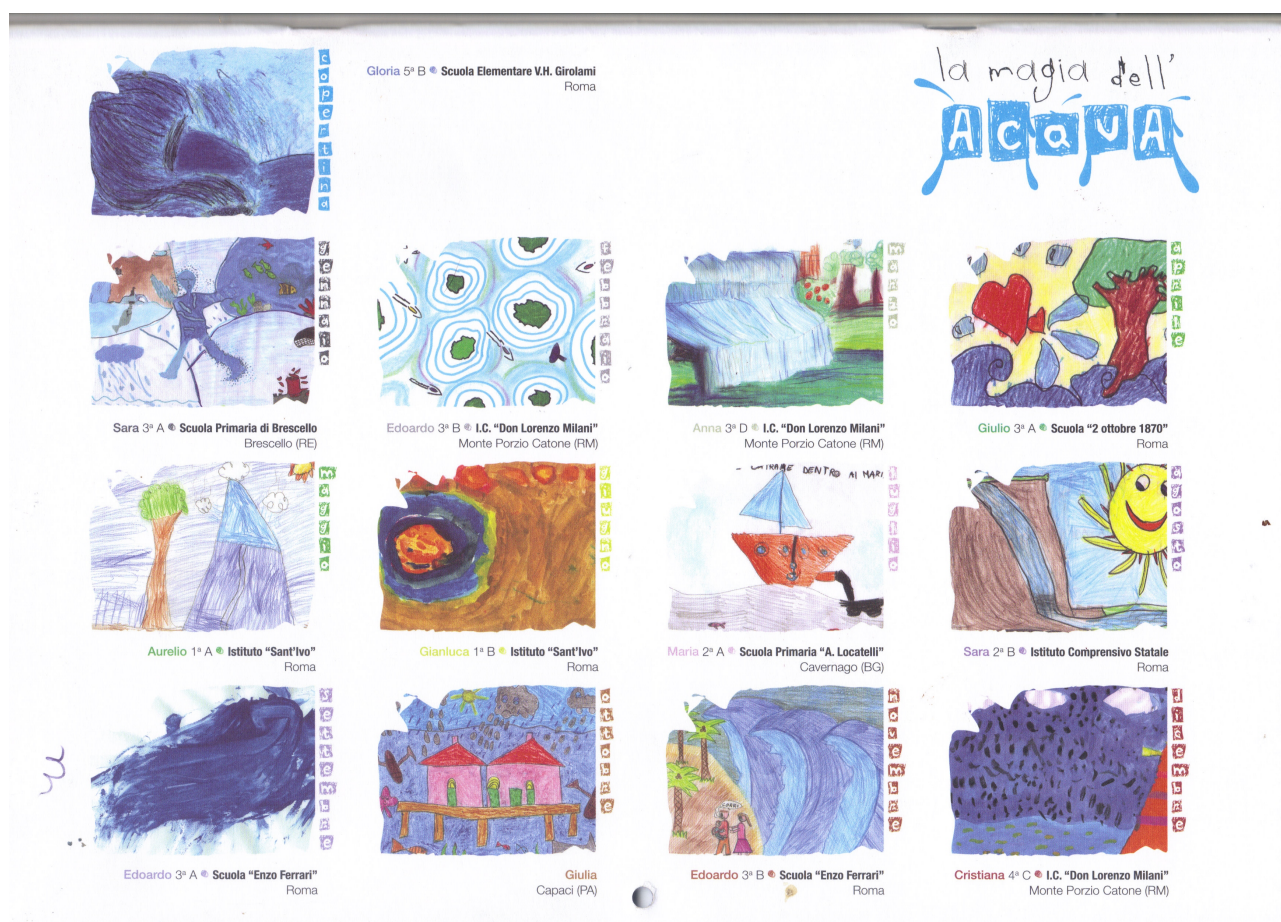

**Fig. 7.** The back page of the 2014 calendar dedicated the to the water (edited by INGV Laboratorio Didattica e Divulgazione Scientifica and INGV Laboratorio Grafica e Immagini).

#### 4. Final Considerations

The organization of training and outreach activities implies the analysis of cognitive and emotional outcomes by intercepting the experience of the beneficiaries. Projects with schools and with public have been analysed in order to catch the effects of training activities and motivations for participation. These studied provided information over the years on the liking and effectiveness of training proposal in various contexts (D'Addezio, 2019; D'Addezio *et al.*, 2014; Lanza *et al.*, 2013; Musacchio *et al.*, 2015a; Musacchio *et al.*, 2015b). Moreover, we can built a more general analysis of how the scientific message is received, how efficient scientists are in transferring concepts, ideas, information in a correct but also captivating way.

Besides the competitions, the drawings we received in ten years of continuous dialogue with schools depict children impressions and reflections, providing an opportunity to illustrate the children's point of view. A critical analysis of the drawings should take in consideration the relation to both the Earth Sciences and the images that surround children today. The information children have about an environmental issue will be crucial for mental representation. Children's drawings can thus provide



valuable information on the development of children's environmental perceptions (Farokhi and Hashemi, 2011). But how young people cope with global problems, such as climate change, potentially worrying and distressing? Generally, children use less problem-focused coping and more distancing to cope with worry and place trust in researchers and technological development to a higher degree (Ojala, 2012). Our analysis shows the same attitude in the children perception. In fact, a great consideration, a deep environmental concern and respect for the planet arise from the drawings and texts we have collected. As in other works, children demonstrated a positive relationship with nature (Kalvaitis and Monhardt, 2012). A similar positive relation emerges from our drawings between children and science and scientists. Science and technology are perceived as powerful tools, capable to handed the continuous challenges humanity is facing. Moreover, children represent themselves as users of these tools to solve problems and improve the world. In this light, the outcome we have catch from the calendar project, raise hopes that similar initiatives can contribute to increase the knowledge of the Earth and of the fragile human ecosystem in the hearts and minds of future active citizens.

304  
305  
306  
307  
308

The author declare that she has no conflict of interest. Figures are from INGV publications.

## References

310

Avvisati, G., de Vita, S., Di Vito, M. A., Marotta, E., Sangianantoni, A., Peluso, R. G., Ricciardi, P., Tulino, S., Uzzo, T., Ghilardi, M., and De Natale, G.: Reale Osservatorio Vesuviano: the First Volcanological Observatory in the World. *Geophysical Research Abstracts* Vol. 17, EGU2015-1671, (2015).

315

Burrato, P., Nostro, C., Tertulliani, A., Winkler, A., Casale, P., Marsili, A., Castellano, C. Cultrera, G., Scarlato P., Alfonsi, L., Ciaccio M.G., and Frepoli, A.: When the Earth has a Belly-Ache: Young Seismologists at School. *Eos Trans. AGU*, 85(47), Fall Meet. Suppl., Abstract ED33A-0759, (2004).

319

Cherney, I. D., Seiwert, C. S., Dikey, T. M., and Flichtbeil, J. D.: Children's Drawings: A mirror to their minds, *Educational Psychology*, Vol. 6, 127-142, doi.org/10.1080/01443410500344167, (2006).

323

D'Addezio, G., Rubbia, G., and Marsili, A.: The experience of ScienzaAperta, a week of scientific information and dissemination. *Engineering Geology for Society and Territory*, Volume 7, 103-107, (2014).

327

D'Addezio G., Giordani, A., Valle, V., and Riposati, D.: 100 years after the Marsica earthquake: contribute of outreach activities. *Geophysical Research Abstracts*, Vol. 17, EGU2015-13401-1, (2015).

330  
331

332 D'Addezio, G.: Il libro dei commenti di mostre scientifiche temporanee: analisi e prospettive, In:  
 333 Studi empirici di educazione museale, edited by Poce A., Edizioni Scientifiche Italiane, Napoli, ISBN  
 334 978-88-495-4063-5, (2019).  
 335  
 336 Farokhi, M., and Hashemi, M.: The Analysis of Children's Drawings: Social, Emotional, Physical,  
 337 and Psychological aspects, *Procedia - Social and Behavioral Sciences* 30 (2011) 2219 – 2224.  
 338 doi:10.1016/j.sbspro.2011.10.433, (2011).  
 339  
 340 Izadkhah, Y.O, and Gibbs, L.: A study of preschoolers' perceptions of earthquakes through drawing.  
 341 *International Jou. of Disaster Risk Reduction*, Vol. 14 132-139.  
 342 doi.org/10.1016/j.ijdr.2015.06.002, (2015).  
 343  
 344 Kalvaitis, D., and Monhardt, R. M.: The architecture of children's relationships with nature: a  
 345 phenomenographic investigation seen through drawings and written narratives of elementary  
 346 students. *Environmental Education Research*, Vol. 18, 209-227,  
 347 doi.org/10.1080/13504622.2011.598227, (2012).  
 348  
 349 Lanza, T., Crescimbeni, M., La Longa, F., and D'Addezio, G.: Bringing Earth into a Scene of a  
 350 Primary School: a Science Theatre Experience, *Science Communication*, Vol. 36, 131-139, doi:  
 351 10.1177/1075547012473841, (2013).  
 352  
 353 Musacchio, G., Piangiamore, G. L., D'Addezio, G., Solarino, S. and Eva, E.: "Scientist as a game":  
 354 Learning geoscience via competitive activities. *Annals of Geoph.*, Vol. 58, doi:10.4401/ag-6695,  
 355 (2015a).  
 356  
 357 Musacchio G., Lanza, T., and D'Addezio, G.: An experience of science theatre to explain the interior  
 358 of the Earth and its hazard to children. *Journal of Education and Learning*, Vol. 4, (2015b).  
 359  
 360 Ojala, M.: Regulating worry, promoting hope: How do children, adolescents, and young adults cope  
 361 with climate change?. *International Journal of Environmental & Science Education*, Vol. 7, 537-561,  
 362 ISSN 1306-3065, (2012).  
 363  
 364 Riposati, D., D'Addezio, G., Di Laura, F., Misiti, V., and Battelli, P.: Graphic design and scientific  
 365 research: the INGV experience, submitted to this Volume.  
 366  
 367 Rubbia, G., D'Addezio, G., Marsili, A., and Carosi, A.: Science and scientists from the children point  
 368 of view, an overlook from drawings. *Geological Society, London, Special Publications* 419 (1), 161-  
 369 170. <http://dx.doi.org/10.1144/SP419.11>, (2015).
